# Supplementary material for: In Vivo Analysis of Human Immune Responses in Immunodeficient Rats
Source: Transplantation. 2020 Mar 31;104(4):715–23. doi: 10.1097/TP.0000000000003047 (PMC7147402; doi:10.1097/TP.0000000000003047)
Supplement: Supplementary file 1 [file tp-104-715-s001.pdf]

**Figure S1.**

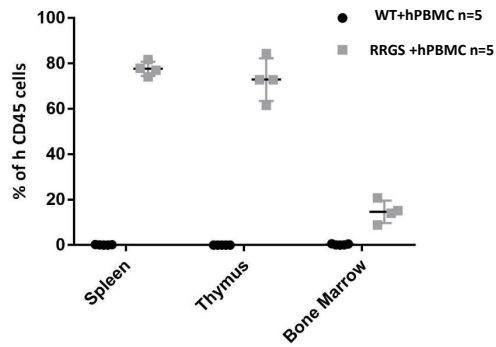

**Figure S1: Analysis of the proportion of hCD45+ cells in RRGs animals immune humanized with hPBMCs.** RRGs or WT animals (n=5 each) were injected iv with hPBMCs ( $430 \cdot 10^6$  cells/Kg) from healthy volunteers and sacrificed at day 13 after hPBMCs infusion. hCD45+ cells were analyzed in the indicated organs.

Figure S2.

|                   |   | hutching | fur   | skin  | activity | diarrhea | weight loss | total |
|-------------------|---|----------|-------|-------|----------|----------|-------------|-------|
| WT+hPBMC<br>n=5   | 1 | 0        | 0     | 0     | 0        | 0        | 0           | 0     |
|                   | 2 | 0        | 0     | 0     | 0        | 0        | 0           | 0     |
|                   | 3 | 0        | 0     | 0     | 0        | 0        | 0           | 0     |
|                   | 4 | 0        | 0     | 0     | 0        | 0        | 0           | 0     |
|                   | 5 | 0        | 0     | 0     | 0        | 0        | 0           | 0     |
| RRGS+hPBMC<br>n=5 | 1 | 1 D11    | 1 D11 | 1 D12 | 1 D11    | 0        | 1 D11       | 5     |
|                   | 2 | 1 D11    | 1 D11 | 1 D12 | 1 D11    | 0        | 1 D11       | 5     |
|                   | 3 | 1 D11    | 1 D11 | 1 D12 | 1 D11    | 0        | 1 D12       | 5     |
|                   | 4 | 1 D10    | 1 D11 | 1 D11 | 1 D10    | 0        | 1 D11       | 5     |
|                   | 5 | 1 D10    | 1 D11 | 1 D11 | 1 D10    | 0        | 1 D11       | 5     |

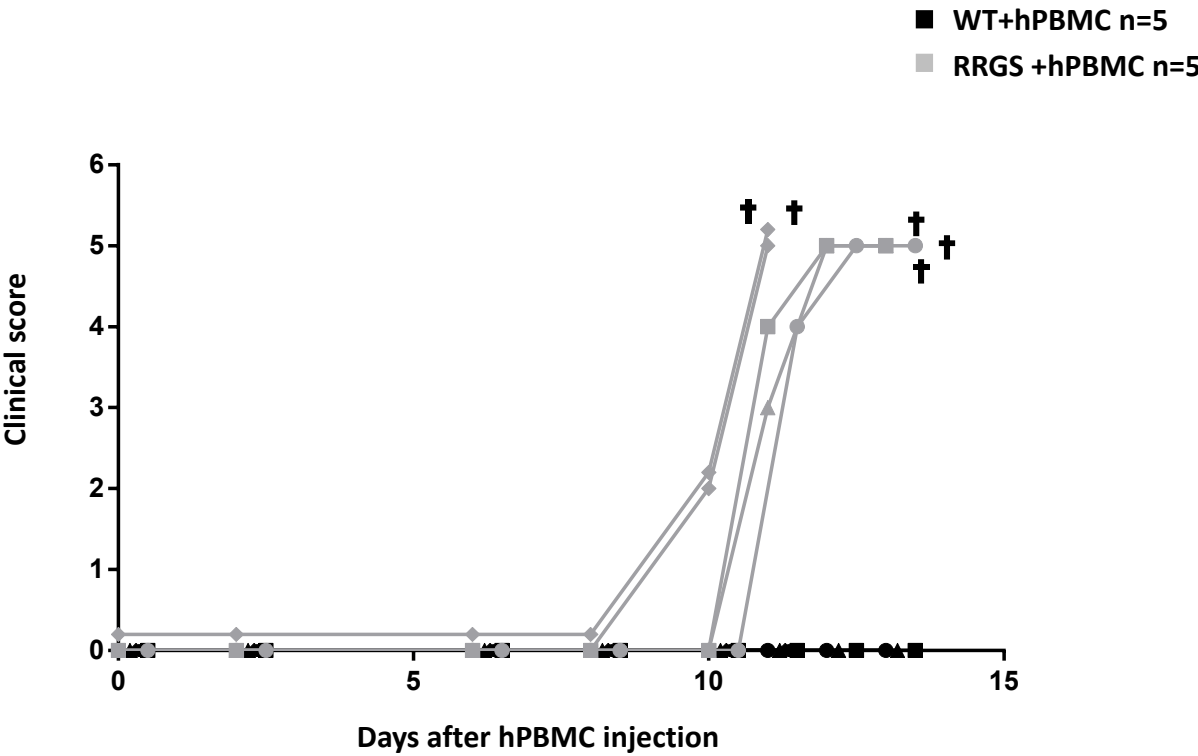

**Figure S2. aGVHD clinical score of RRGs animals injected with hPBMCs.** hPBMCs ( $430 \cdot 10^6$  cells/Kg) from healthy volunteers were injected iv in RRGs or WT animals. Different clinical parameters; hutching, rough fur, skin lesions, decreased physical activity, diarrhea, and weight loss were scored as 0=no signs, 1=present. WT+hPBMCs, n=5. RRGs+hPBMCs, n=5.

Figure S3

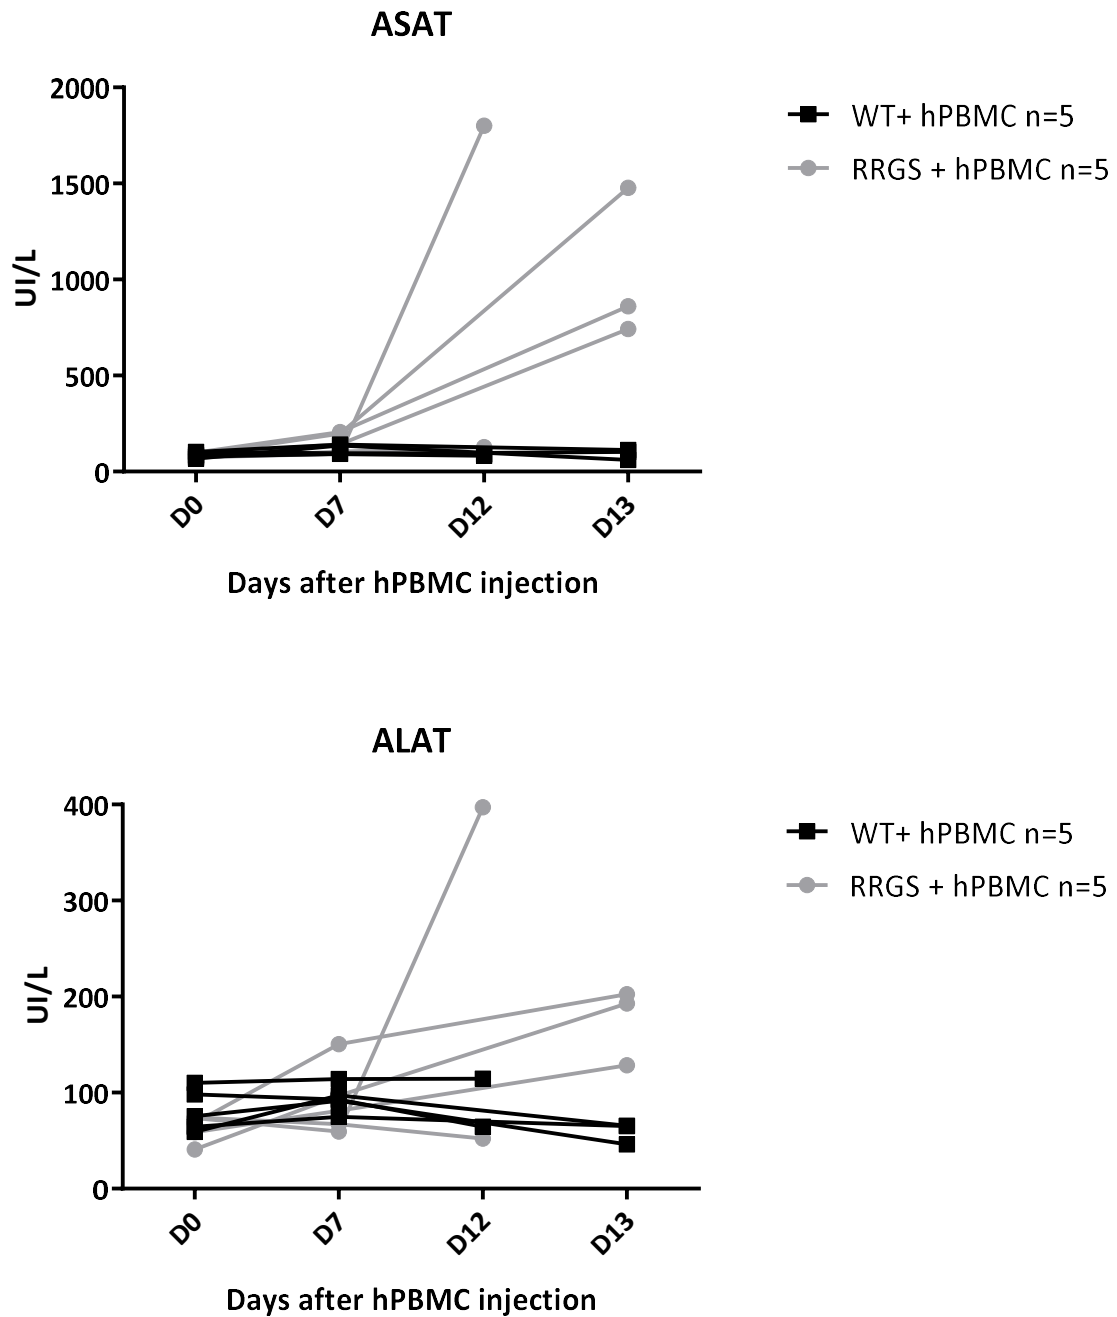

**Figure S3. Alanine and aspartate transaminases (ALT and AST) in serum during aGVHD in RRGs animals.** hPBMCs ( $430 \cdot 10^6$  cells/Kg) from healthy volunteers were injected iv in RRGs or WT animals and serum was harvested at the indicated time points for analysis of AST and ALT. WT+hPBMCs, n=5. RRGs+hPBMCs, n=5.

Figure S4

|                             |   | hutching | fur   | skin  | activity | diarrhea | weight loss | total |
|-----------------------------|---|----------|-------|-------|----------|----------|-------------|-------|
| RRGS+<br>hPBMC+ 67p<br>n=5  | 1 | 1 D15    | 1 D15 | 1 D17 | 1 D15    | 0        | 1 D14       | 5     |
|                             | 2 | 1 D15    | 1 D15 | 1 D17 | 1 D15    | 0        | 1 D14       | 5     |
|                             | 3 | 1 D13    | 1 D13 | 0     | 1 D13    | 0        | 1 D10       | 4     |
|                             | 4 | 1 D11    | 1 D11 | 1 D11 | 1 D11    | 0        | 1 D10       | 5     |
|                             | 5 | 1 D15    | 1 D15 | 0     | 1 D15    | 0        | 1 D13       | 4     |
| RRGS+<br>hPBMC+ LIS1<br>n=5 | 1 | 0        | 0     | 0     | 0        | 0        | 0           | 0     |
|                             | 2 | 0        | 0     | 0     | 0        | 0        | 0           | 0     |
|                             | 3 | 0        | 0     | 0     | 0        | 0        | 0           | 0     |
|                             | 4 | 0        | 0     | 0     | 0        | 0        | 0           | 0     |
|                             | 5 | 0        | 0     | 0     | 0        | 0        | 0           | 0     |

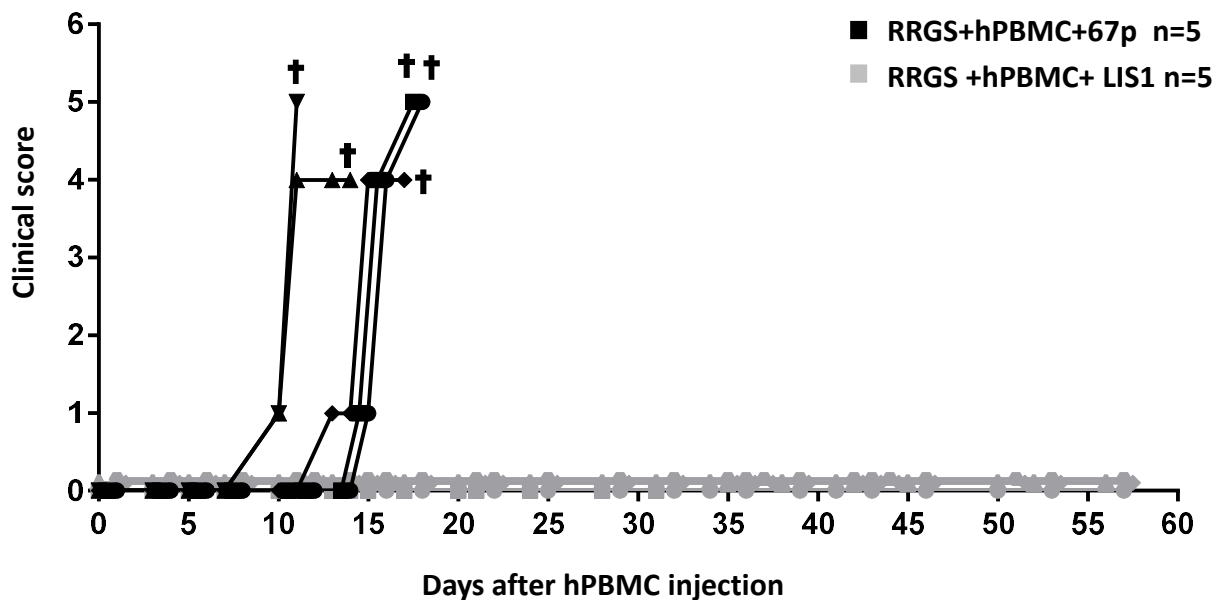

**Figure S4. aGVHD clinical score of RRGs animals injected with hPBMCs treated or not with LIS1.** hPBMCs from healthy volunteers were injected iv ( $215 \cdot 10^6$  cells/Kg) in RRGs animals treated or not with LIS1 or 67p (antibody control). Different clinical parameters; hutching, rough fur, skin lesions, decreased physical activity, diarrhea, and weight loss were scored as 0=no signs, 1=present. RRGs+hPBMCs+67p, n=5. RRGs+hPBMCs+LIS1, n=5.

Figure S5

|                           |   | hutching | fur   | skin | activity | diarrhea | weight loss | total |
|---------------------------|---|----------|-------|------|----------|----------|-------------|-------|
| Tumor cells+<br>hPBMC n=4 | 1 | 0        | 0     | 0    | 0        | 0        | 0           | 0     |
|                           | 2 | 0        | 0     | 0    | 0        | 0        | 0           | 0     |
|                           | 3 | 0        | 0     | 0    | 0        | 0        | 0           | 0     |
|                           | 4 | 0        | 0     | 0    | 0        | 0        | 0           | 0     |
| Tumor cells<br>only n=4   | 1 | 1 D26    | 1 D23 | 0    | 1 D23    | 0        | 1 D19       | 4     |
|                           | 2 | 0        | 0     | 0    | 0        | 0        | 0           | 0     |
|                           | 3 | 0        | 0     | 0    | 0        | 0        | 0           | 0     |
|                           | 4 | 0        | 0     | 0    | 0        | 0        | 0           | 0     |

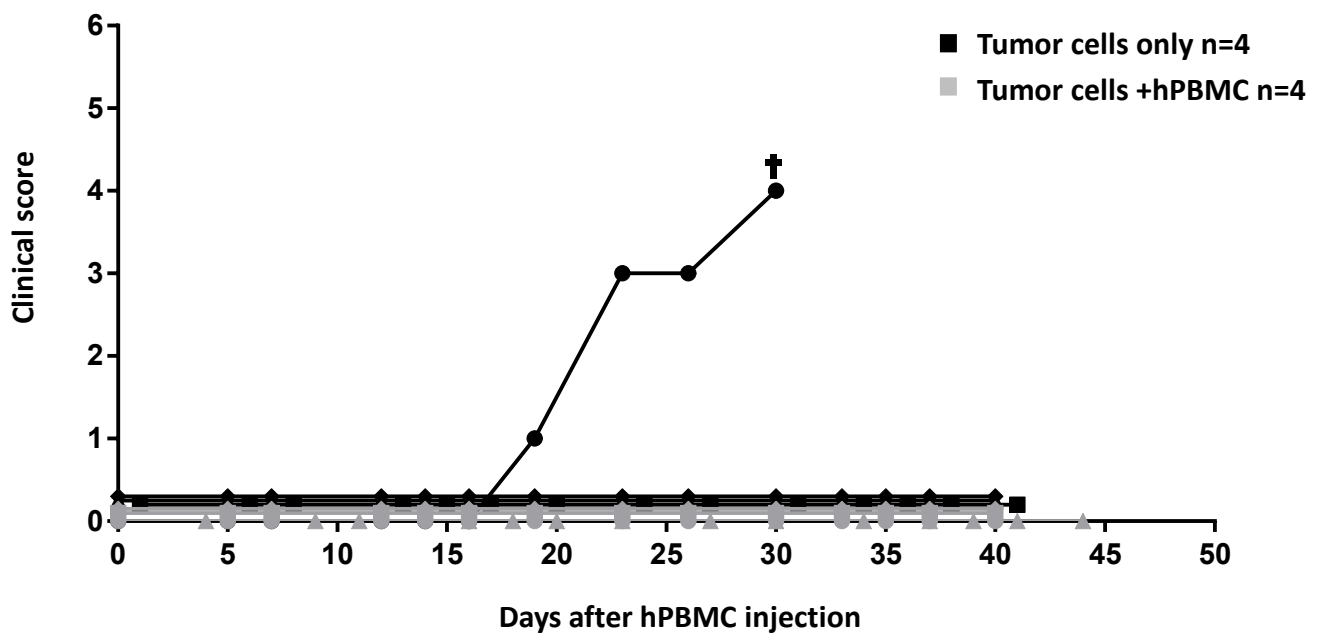

**Figure S5. aGVHD clinical score of RRGs animals injected with hPBMCs and tumors.** RRGs animals were injected with a human tumor cell line (B2 cells line) and then injected or not with hPBMCs iv ( $161 \cdot 10^6$  cells/Kg). Different clinical parameters; hutching, rough fur, skin lesions, decreased physical activity, diarrhea, and weight loss were scored as 0=no signs, 1=present. RRGs+ tumor cells, n=4. RRGs+ tumor cells + hPBMC, n=4. One out of 4 RRGs+hPBMC animals developed aGVHD.
